# Supplementary material
Source: MDPI journal article supplement (https://www.mdpi.com/2409-515X/7/4/73)
Supplement: s1 [file s1]

**Table S1: Region of interest reported by the third-tier Archer CF assay**

| <b><i>CFTR</i> Exon<sup>1</sup></b> | <b>Start (hg19)</b> | <b>Stop (hg19)</b> | <b>Reported<br/>Region Size</b> |
|-------------------------------------|---------------------|--------------------|---------------------------------|
| 5'UTR                               | 117,120,041         | 117,120,211        | 171                             |
| 1                                   |                     |                    |                                 |
| 2                                   | 117,144,297         | 117,144,427        | 131                             |
| 3                                   | 117,149,078         | 117,149,206        | 129                             |
| 4                                   | 117,170,943         | 117,171,178        | 236                             |
| 5                                   | 117,174,320         | 117,174,429        | 110                             |
| 6 (6a)                              | 117,175,292         | 117,175,475        | 184                             |
| 7 (6b)                              | 117,176,597         | 117,176,737        | 141                             |
| intron 7 (6b)                       | 117,179,036         | 117,179,049        | 14                              |
| 8 (7)                               | 117,180,144         | 117,180,410        | 267                             |
| 9 (8)                               | 117,182,060         | 117,182,172        | 113                             |
| 10 (9)                              | 117,188,690         | 117,188,887        | 198                             |
| 11 (10)                             | 117,199,508         | 117,199,719        | 212                             |
| intron 11 (10)                      | 117,218,376         | 117,218,386        | 11                              |
| 12 (11)                             | 117,227,783         | 117,227,897        | 115                             |
| intron 12 (11)                      | 117,229,516         | 117,229,535        | 20                              |
| 13 (12)                             | 117,230,397         | 117,230,503        | 107                             |
| 14 (13)                             | 117,231,978         | 117,232,721        | 744                             |
| 15 (14a)                            | 117,234,974         | 117,235,122        | 149                             |
| 16 (14b)                            | 117,242,870         | 117,242,927        | 58                              |
| 17 (15)                             | 117,243,576         | 117,243,846        | 271                             |
| 18 (16)                             | 117,246,718         | 117,246,817        | 100                             |
| 19 (17a)                            | 117,250,563         | 117,250,733        | 171                             |
| 20 (17b)                            | 117,251,605         | 117,251,872        | 268                             |
| 21 (18)                             | 117,254,657         | 117,254,777        | 121                             |
| 22 (19)                             | 117,267,566         | 117,267,834        | 269                             |
| intron 22 (19)                      | 117,267,859         | 117,267,869        | 11                              |
|                                     | 117,280,010         | 117,280,020        | 11                              |
| 23 (20)                             | 117,282,482         | 117,282,657        | 176                             |
| 24 (21)                             | 117,292,886         | 117,292,995        | 110                             |
| 25 (22)                             | 117,304,732         | 117,304,924        | 193                             |
| 26 (23)                             | 117,305,503         | 117,305,628        | 126                             |
| 27 (24)                             | 117,306,952         | 117,307,262        | 311                             |
| 3'UTR                               |                     |                    |                                 |

*UTR* – Untranslated region, *hg19* – human genome assembly GRCh37.

<sup>1</sup> Legacy *CFTR* nomenclature listed in parentheses, if different from HGVS nomenclature.

**Table S3: *CFTR* TaqMan SNP genotyping assays**

| <b><i>CFTR</i> Variant<sup>1</sup></b> | <b>SNP Genotyping Assay ID<sup>2</sup></b> | <b>dbSNP ID</b> |
|----------------------------------------|--------------------------------------------|-----------------|
| p.Arg117His (R117H)                    | C__26083773_20                             | rs78655421      |
| p.Phe508del (F508del)                  | C_151693869_10                             | rs113993960     |
| p.Gly542* (G542X)                      | C__11399026_30                             | rs113993959     |
| p.Gly551Asp (G551D)                    | C__32545127_20                             | rs75527207      |
| p.Arg553* (R553X)                      | C__27861430_20                             | rs74597325      |
| c.2988+1G>A (3120+1G>A)                | C_100964958_20                             | rs75096551      |
| p.Asn1303Lys (N1303K)                  | C__32544994_20                             | rs80034486      |
| p.Trp1282* (W1282X)                    | C__32545014_20                             | rs77010898      |

<sup>1</sup>Legacy *CFTR* nomenclature listed in parentheses.

<sup>2</sup> ThermoFisher assay ID.

**Table S4: Multiplex schema for del/dup qPCR assays**

| <b>Assay Name<sup>1</sup></b> | <b><i>CFTR</i> Exon<sup>1</sup> with<br/>FAM probe</b> | <b><i>CFTR</i> Exon<sup>1</sup> with<br/>VIC probe</b> |
|-------------------------------|--------------------------------------------------------|--------------------------------------------------------|
| E1+2                          | 2                                                      | 1                                                      |
| E3+4                          | 3                                                      | 4                                                      |
| E5+7 (E5+6b)                  | 7 (6b)                                                 | 5                                                      |
| E6+8 (E6a+7)                  | 8 (7)                                                  | 6 (6a)                                                 |
| E9+16 (E8+14b)                | 9 (8)                                                  | 16 (14b)                                               |
| E10+17 (E9+15)                | 10 (9)                                                 | 17 (15)                                                |
| E11+19 (E10+17a)              | 11 (10)                                                | 19 (17a)                                               |
| E12+24 (E11+21)               | 12 (11)                                                | 24 (21)                                                |
| E13+22 (E12+19)               | 13 (12)                                                | 22 (19)                                                |
| E14+20 (E13+17b)              | 14 (13)                                                | 20 (17b)                                               |
| E15+25 (E14a+22)              | 15 (14a)                                               | 25 (22)                                                |
| E18+26 (E16+23)               | 18 (16)                                                | 26 (23)                                                |
| E21+27 (E18+24)               | 21 (18)                                                | 27 (24)                                                |
| E23 (E20)                     | 23 (20)                                                | N/A                                                    |

*del/dup* – deletion/duplication.

All assays multiplexed with *RPPH1* reference assay (ThermoFisher, 4485714) with ABY reporter dye and QSY quencher. FAM probes have an MGB-NFQ quencher, and the VIC probes have a QSY quencher.

<sup>1</sup> Legacy *CFTR* nomenclature listed in parentheses, if different from HGVS nomenclature.

**Table S5: Del/dup qPCR primer and probe sequences**

| <b>CFTR Exon<sup>1</sup></b> | <b>Forward primer sequence (5'&gt;3')</b> | <b>Reverse primer sequence (5'&gt;3')</b> | <b>Probe Sequence (5'&gt;3')</b>    |
|------------------------------|-------------------------------------------|-------------------------------------------|-------------------------------------|
| 1                            | GCAGGCACCCAGAGTAGTAGGT                    | ACGCCCTCCTCTTTCGTG                        | TTTGGCATTAGGAGCTTGAGCCCAGA          |
| 2                            | AGCTGGACCAGACCAATTTTGA                    | CAGATAGATTGTCAGCAGAATCAACAG               | CCTGGAATTGTCAGACATATA               |
| 3                            | TTTGACATGCAACTTATTGGTC                    | TGATACATAATGAATGTACAAATGAGATCC            | CTGGCTTCAAAGAAA                     |
| 4                            | AGCCTCTCTTACTGGGAAGAATCATA                | GTGATGAAGGCCAAAAATGGC                     | AGGCTTATGCCTTCTCTTTATTGTGAGGACACTG  |
| 5                            | TTAAAGCTGTCAAGCCGTGTTCT                   | GGAAAACTCCGCCTTTCAG                       | CAACTTGTTAGTCTCCTTTCCAACAACCTGAACA  |
| 6 (6a)                       | CTTGCAATTGGCAYATTTCTG                     | AATAGGTTGCTACCTGTACTTCATCATC              | CAAGTGGCACTCCTCATGGGGCTAATCT        |
| 7 (6b)                       | TCAGAGAGCTGGGAAGATCAGTG                   | CCATTGCTTCTCCAGCAG                        | TGTGATTACCTCAGAAATGA                |
| 8 (7)                        | GAACTGAACTGACTCGGAAGGC                    | AGTGCATAGGGAAGCACAGATAAAA                 | TGTGAGATACTTCAATAGCTCAG             |
| 9 (8)                        | AATCCTAGTGCTTGGCAAATTAACTTT               | AGAAGGCTGTTACATTCTCCATCACTA               | CAAGAATATAAGACATTGGAATAT            |
| 10 (9)                       | TGATGACAGCCTCTTCTTCAGTAATT                | GAACTACCTTGCTCTCCAGT                      | ATTAATTTCAAGATAGAAAGAGGACAGTT       |
| 11 (10)                      | CTGGAGCCTTCAGAGGGTAAA                     | TGCTTTGATGAKGCTTCTGTATC                   | TCCTGGATTATGCCTGGCA                 |
| 11 (10)                      | CTGGAGCCTTCAGAGGGTAAA                     | TGCTTTGATGAKGCTTCTGTATC                   | TCCTGGATTATGCCTGGCA                 |
| 12 (11)                      | ACATCTCAAAGTTTGACAGAGAAAGA                | CTTAACCCACTAGCCATAAAACCC                  | TGAATAACTAATTATTGGTCTAGCAAG         |
| 13 (12)                      | GCATGTAGTGAAGTGTAAAGGCAAAT                | CATGAGCATTATAAGTAAGGTATTCAAAGAA           | ACACTAGATGACCAGGAAA                 |
| 14 (13)                      | AATTTTGCATGAAGGTAGCAGCT                   | GGTCGAAAGAATCACATCCCA                     | TCTACAGCCAGACTTTAG                  |
| 15 (14a)                     | AATAAAACCACAATGGTGGCATG                   | ATGTAGTCACTGCTGGTATGCTCTC                 | AACTGTACTGTCTTATTGTAATAG            |
| 16 (14b)                     | TGTGTACCTTGATATTGGTACACACATC              | GAGCCACAGCACAAACAAAGA                     | ACTGTGTCTTGTCCATTCCAGGTGGCT         |
| 17 (15)                      | AACAGCTATGCAGTGATTATCACCAG                | GACCTCTGAAGAATCCCATAGCA                   | TATGTGTTTTACATTTACGTGGGAGTAGCCGACA  |
| 18 (16)                      | TGCTAATTCTTATTGGGTTCTGAATG                | GGCAGAAGGTCATCCAAAATTG                    | CATCTTGTATATTATAGGTGGGATT           |
| 19 (17a)                     | CAGTTGTCGCAGTTTTACAACCC                   | TTACAAGATGAGTATCGCACATTAC                 | TCACAGCAACTCAAACAAGTGAATCTGAAGGTAT  |
| 20 (17b)                     | TCACTCATCTTGTTACAAGCTTAAAAGG              | AATGGAAATGAAGGTAACAGCAATG                 | TTCCACAAAGCTCTGAATTTACATACTGCCAACT  |
| 21 (18)                      | ACATTGCAGTGGGCTGTAAACTC                   | TCATGCTATTACTCATACTTTGTTACTTGTCT          | ATGTGGATAGCTTGGTAAGT                |
| 22 (19)                      | CAAACCATACAAGAATGGCCAAC                   | AACAAAGCAAGCAGTGTTCAAATC                  | GCCAAATGACTGTCAAAGATCTCACAGCA       |
| 23 (20)                      | TTTACCTTATAGGTGGGCCTCTTG                  | TTCTGGCTAAGTCCTTTTGCTCA                   | AGCCTTTGGAGTGATACC                  |
| 24 (21)                      | GAGGTAAGGCTGCTAACTGAAATGA                 | TGTTGCTCCAGGTATGTTAGGGTAC                 | AACTCATACCAACACAAATGGCTGATATAGCTGAC |
| 25 (22)                      | ACATAAGCTTTCAGAACTCCTGTGTTT               | CCATCCACAAGGACAAAGTCAA                    | TTCTCTAACTGCAGGTTGGGCTCAGATCTG      |
| 26 (23)                      | AAGCATTGCTGATTGCACAGT                     | AAGGGCAATGAGATCTTAAGTAAAGTTATAA           | AGGATAGAAGCAATGCTGGAATGCCAACA       |
| 27 (24)                      | AGGCTCTGGACATTGCATTCTT                    | TGCTTGAGTTCCGGTGGG                        | TCCTTTGAGCCTGTGCCAGTTTCTGTC         |

*del/dup* – deletion/duplication.

<sup>1</sup> Legacy *CFTR* nomenclature listed in parentheses, if different from HGVS nomenclature.

**Table S6: Del/dup qPCR assay relative quantity reference intervals**

| Average RQ    | Copy Number | Interpretation                             |
|---------------|-------------|--------------------------------------------|
| Undetermined  | 0           | Homozygous for <i>CFTR</i> exon deletion   |
| 0.001 – 0.299 | Unknown     | Equivocal results                          |
| 0.300 – 0.599 | 1           | Heterozygous for <i>CFTR</i> exon deletion |
| 0.600 – 0.799 | Unknown     | Equivocal results                          |
| 0.800 – 1.200 | 2           | Normal                                     |
| 1.201 – 1.249 | Unknown     | Equivocal results                          |
| ≥1.250        | ≥3          | Amplification <sup>1</sup>                 |

RQ – relative quantity.

<sup>1</sup> Positive deletion and duplication controls were not available for all exons. qPCR assays were validated to detect heterozygous deletions including exons: 1-9,12,14,19-21 and 25-26 (1-8,11,13,17a-18 and 22-23), and duplications/amplifications including exons: 1-3,7-8,18-22 and 25-27 (1-3,6b-7,16-19 and 22-24).

**Table S7: Recurrent artifacts in 58 of 181 specimens analyzed using the SV algorithm**

| <b><i>CFTR</i> Exon(s)<br/>Affected<sup>1</sup></b> | <b>Del/dup</b> | <b>Number<br/>Start<br/>Sites<sup>2</sup></b> | <b>Number<br/>Reads<sup>2</sup></b> | <b>% Reads<sup>2</sup></b> | <b>Strong<br/>SV<sup>2</sup></b> | <b>Breakpoint<br/>(hg19)<sup>2</sup></b>         | <b>Breakpoint<br/>(hg19)<sup>2</sup></b>         | <b>Size<br/>(bp)<sup>3</sup></b> |
|-----------------------------------------------------|----------------|-----------------------------------------------|-------------------------------------|----------------------------|----------------------------------|--------------------------------------------------|--------------------------------------------------|----------------------------------|
| intron 20<br>(intron 17b)                           | Del            | 5 – 126                                       | 6 – 457                             | 2.1 – 92.6                 | Y                                | Variable.<br>minimum<br>observed:<br>117,252,060 | Variable.<br>maximum<br>observed:<br>117,252,122 | 46 – 52                          |
| 27 - 3'UTR<br>(24 - 3'UTR)                          | Del            | 4 – 19                                        | 6 – 35                              | 0.5 – 12.1                 | Y                                | 117,307,228                                      | 117,307,260                                      | 33                               |
| 27 - 3'UTR<br>(24 - 3'UTR)                          | Del            | 4 – 14                                        | 5 – 29                              | 0.7 – 8.3                  | Y                                | 117,307,194                                      | 117,307,226                                      | 33                               |

*Del* – deletion, *Dup* – duplication, *hg19* – human genome assembly GRCh37, *bp* – base pair, *UTR* – untranslated region.

<sup>1</sup>Legacy exon *CFTR* nomenclature listed in parentheses. <sup>2</sup>Output from SV algorithm. <sup>3</sup>Size determined using the SV algorithm.

**Table S8: Del/dup detected by each algorithm**

| <b>CFTR Exon(s) Affected</b> | <b>Del/Dup</b> | <b>HGVS Nomenclature<sup>1,4</sup></b> | <b># NYS alleles tested<sup>3</sup></b> | <b>Vision/FreeBayes<sup>2,3</sup></b> | <b>SV<sup>3,4</sup></b> | <b>CNV<sup>3,4</sup></b> | <b>Comments</b>                                                                                                                                             |
|------------------------------|----------------|----------------------------------------|-----------------------------------------|---------------------------------------|-------------------------|--------------------------|-------------------------------------------------------------------------------------------------------------------------------------------------------------|
| 14 (13)                      | Del            | c.1820_1903del                         | 12                                      | 12/12                                 | 12/12                   | 0/12                     | Legacy=1949del84. Too small to be detected by CNV algorithm.                                                                                                |
| 1-9 (1-8)                    | Del            | c.(?_1)_( 1209+1_1210-1)del            | 1                                       | 0/1                                   | 0/1                     | 1/1                      | Breakpoints not included in assay design.                                                                                                                   |
| 2                            | Del            | c.(53+1_54-1)_(164+1_165-1)del         | 2                                       | 0/2                                   | 0/2                     | 2/2                      | Breakpoints for several reported deletions in exon 2 were targeted; but the exact exon 2 breakpoints in these samples (unknown) may not have been included. |
| 2-3                          | Del            | c.54-5940_273+10250del                 | 3                                       | 0/3                                   | 3/3                     | 3/3                      | Called using SV and CNV algorithms.                                                                                                                         |
| 2-4                          | Del            | c.(53+1_54-1)_(489+1_490-1)del         | 1                                       | 0/1                                   | 1/1                     | 1/1                      | Called using SV and CNV algorithms.                                                                                                                         |
| 18-21 (16-18)                | Dup            | c.(2908+1_2909-1)_(3468+1_3469-1)dup   | 1                                       | 0/1                                   | 0/1                     | 1/1                      | Breakpoints not included in assay design.                                                                                                                   |
| 19-21 (17a-18)               | Del            | c.2988+1168_3468+2108del               | 2                                       | 0/2                                   | 2/2                     | 2/2                      | Reliably called using SV and CNV algorithms.                                                                                                                |
| 25-26 (22-23)                | Del            | c.3964-82_4242+575del                  | 2                                       | 0/2                                   | 2/2                     | 1/2                      | Likely too small to be reliably detected by CNV algorithm.                                                                                                  |

*Del* – deletion, *Dup* – duplication, *SV* – structural variant algorithm, *CNV* – copy number variant algorithm.

<sup>1</sup> HGVS nomenclature relative to NC\_000007.13 and NM\_000492.3.

<sup>2</sup> Vision and FreeBayes both consistently detected c.1820\_1903del (1949del84).

<sup>3</sup> Number detected / number tested using each algorithm. Counts include replicate samples.

<sup>4</sup> Exact breakpoints were unknown for most del/dup, except where specified. Breakpoints reported by the Archer Analysis SV algorithm were slightly different than reported in literature for some del/dup. For example, the deletion at exons 25-26 is reported in CFTR2 as c.3964-78\_4242+577del.

**Table S9: Unique Tier 2 TMF variants identified during the first year of NBS using the Archer CF assay**

| Variant Frequency      | Protein (NP_000483.3) | cDNA (NM_000492.3)                  | Legacy Name            |
|------------------------|-----------------------|-------------------------------------|------------------------|
| Common                 | p.Phe508del           | c.1521_1523delCTT <sup>1,2</sup>    | F508del                |
| Recurrent (≥5 alleles) | p.Arg117His           | c.350G>A <sup>1,2</sup>             | R117H                  |
|                        | p.Trp1282*            | c.3846G>A <sup>1,2</sup>            | W1282X                 |
|                        | N/A                   | c.2988+1G>A <sup>1,2</sup>          | 3120+1G>A              |
|                        | p.Gly542*             | c.1624G>T <sup>1,2</sup>            | G542X                  |
|                        | N/A                   | c.3718-2477C>T <sup>1,2</sup>       | 3849+10kbC>T           |
|                        | p.Gly551Asp           | c.1652G>A <sup>1,2</sup>            | G551D                  |
|                        | N/A                   | c.2657+5G>A <sup>1,2</sup>          | 2789+5G>A              |
|                        | p.Ala559Thr           | c.1675G>A <sup>2</sup>              | A559T                  |
|                        | p.Asn1303Lys          | c.3909C>G <sup>1,2</sup>            | N1303K                 |
|                        | p.Ser549Asn           | c.1646G>A <sup>2</sup>              | S549N                  |
|                        | p.Val456Ala           | c.1367T>C                           | V456A                  |
|                        | p.Leu206Trp           | c.617T>G                            | L206W                  |
|                        | p.Arg334Trp           | c.1000C>T <sup>1,2</sup>            | R334W                  |
|                        | p.Arg553*             | c.1657C>T <sup>1,2</sup>            | R553X                  |
| Rare (2-4 alleles)     | p.Arg658Lysfs*4       | c.1973_1985delGAAATTCATCCTinsAGAAA  | 2105-2117del13insAGAAA |
|                        | p.Ile507del           | c.1519_1521delATC <sup>1,2</sup>    | I507del                |
|                        | p.Arg1162*            | c.3484C>T <sup>1,2</sup>            | R1162X                 |
|                        | p.Arg709*             | c.2125C>T                           | R709X                  |
|                        | N/A                   | c.1585-1G>A <sup>1,2</sup>          | 1717-1G>A              |
|                        | p.Gln685Thrfs*4       | c.2052dupA                          | 2184insA               |
|                        | N/A                   | c.489+1G>T <sup>1,2</sup>           | 621+1G>T               |
|                        | p.Gly85Glu            | c.254G>A <sup>1,2</sup>             | G85E                   |
|                        | p.Leu15Pro            | c.44T>C                             | L15P                   |
|                        | p.Arg1158*            | c.3472C>T                           | R1158X                 |
|                        | p.Arg117Cys           | c.349C>T                            | R117C                  |
|                        | p.Arg560Thr           | c.1679G>C <sup>1,2</sup>            | R560T                  |
|                        | p.Glu726Argfs*4       | c.2175dupA <sup>2</sup>             | 2307insA               |
|                        | N/A                   | c.3140-26A>G                        | 3272-26A>G             |
|                        | p.Lys1250Argfs*9      | c.3744delA <sup>2</sup>             | 3876delA               |
|                        | N/A                   | c.579+3A>G                          | 711+3A>G               |
|                        | p.Phe312del           | c.935_937delTCT                     | F312del or F311del     |
|                        | p.Leu1254*            | c.3761T>G                           | L1254X                 |
|                        | p.Arg347Pro           | c.1040G>C <sup>1,2</sup>            | R347P                  |
|                        | p.Arg352Gln           | c.1055G>A                           | R352Q                  |
|                        | p.Thr1036Asn          | c.3107C>A                           | T1036N                 |
| Private (1 allele)     | p.Cys343*             | c.1029delC                          | 1161delC               |
|                        | N/A                   | c.1209+1G>A                         | 1341+1G>A              |
|                        | p.Ile444Argfs*3       | c.1327_1330dupGATA                  | 1461ins4               |
|                        | p.Lys447Argfs*2       | c.1340delA                          | 1471delA               |
|                        | p.Gly473Glufs*54      | c.1418delG                          | 1548delG               |
|                        | N/A                   | c.1680-877G>T                       | 1811+1643G>T           |
|                        | N/A                   | c.1766+1G>A <sup>1,2</sup>          | 1898+1G>A              |
|                        | p.Lys684Serfs*38      | c.2051_2052delAAinsG <sup>2,3</sup> | 2183AA>G               |
|                        | N/A                   | c.2490+1G>A                         | 2622+1G>A              |
|                        | N/A                   | c.164+1G>T                          | 296+1G>T               |
|                        | N/A                   | c.165-3C>T                          | 297-3C>T               |
|                        | p.Thr1220Lysfs*8      | c.3659delC                          | 3791delC               |
|                        | p.Trp79Leufs*32       | c.233dupT                           | 365-366insT            |
|                        | p.Leu1258Phefs*7      | c.3773dupT <sup>2</sup>             | 3905insT               |
|                        | p.Ile1295Phefs*32     | c.3883_3886delATTT                  | 4010del4               |
|                        | p.Glu1418Argfs*14     | c.4251delA                          | 4382delA               |



| Variant Frequency | Protein (NP_000483.3) | cDNA (NM_000492.3)        | Legacy Name      |
|-------------------|-----------------------|---------------------------|------------------|
|                   | N/A                   | c.579+1G>T <sup>1,2</sup> | 711+1G>T         |
|                   | p.Asn268Ilefs*17      | c.803delA                 | 935delA          |
|                   | p.Asn287Lysfs*19      | c.861_865delCTTAA         | 991del5          |
|                   | p.Ala455Glu           | c.1364C>A <sup>1,2</sup>  | A455E            |
|                   | p.Ala613Thr           | c.1837G>A                 | A613T            |
|                   | p.Cys276*             | c.828C>A                  | C276X            |
|                   | p.Asp110His           | c.328G>C                  | D110H            |
|                   | p.Glu60*              | c.178G>T                  | E60X             |
|                   | p.Gly1244Glu          | c.3731G>A                 | G1244E           |
|                   | p.Lys710*             | c.2128A>T                 | K710X            |
|                   | p.Pro67Leu            | c.200C>T                  | P67L             |
|                   | p.Gln98*              | c.292C>T                  | Q98X             |
|                   | p.Gln996=             | c.2988G>A                 | 3120G>A or Q996Q |
|                   | p.Arg1066Cys          | c.3196C>T                 | R1066C           |
|                   | p.Arg75*              | c.223C>T                  | R75X             |
|                   | p.Ser1159Phe          | c.3476C>T                 | S1159F           |
|                   | p.Ser1255Pro          | c.3763T>C                 | S1255P           |
|                   | p.Ser466*             | c.1397C>G                 | S466X(TAG)       |
|                   | p.Val232Asp           | c.695T>A                  | V232D            |
|                   | p.Trp1098*            | c.3293G>A                 | W1098X(TAG)      |
|                   | p.Trp57*              | c.171G>A                  | W57X             |
|                   | p.Tyr1092*            | c.3276C>A                 | Y1092X           |

N/A – Not applicable. Variants are ordered by frequency, including carriers and infants referred.

<sup>1</sup> ACMG-23 variant.

<sup>2</sup> Luminex xTAG CF39v2 variant.

<sup>3</sup> Vision variant caller reports both c.2052delA and c.2051\_2052delAAinsG for samples that are heterozygous for c.2051\_2052delAAinsG; FreeBayes variant caller and Sanger sequencing confirm the correct call is only c.2051\_2052delAAinsG.
